# Supplementary material
Source: PubMed Central journal article supplement (PMC5453712)
Supplement: jciinsight-2-93911-s001.pdf [file jciinsight-2-93911-s001.pdf]

**Supplementary Information Text and Table File 1 for: Network Analysis of the Genomic Basis of the Placebo Effect, Ms. # 93911-INS-RG-TR-2**

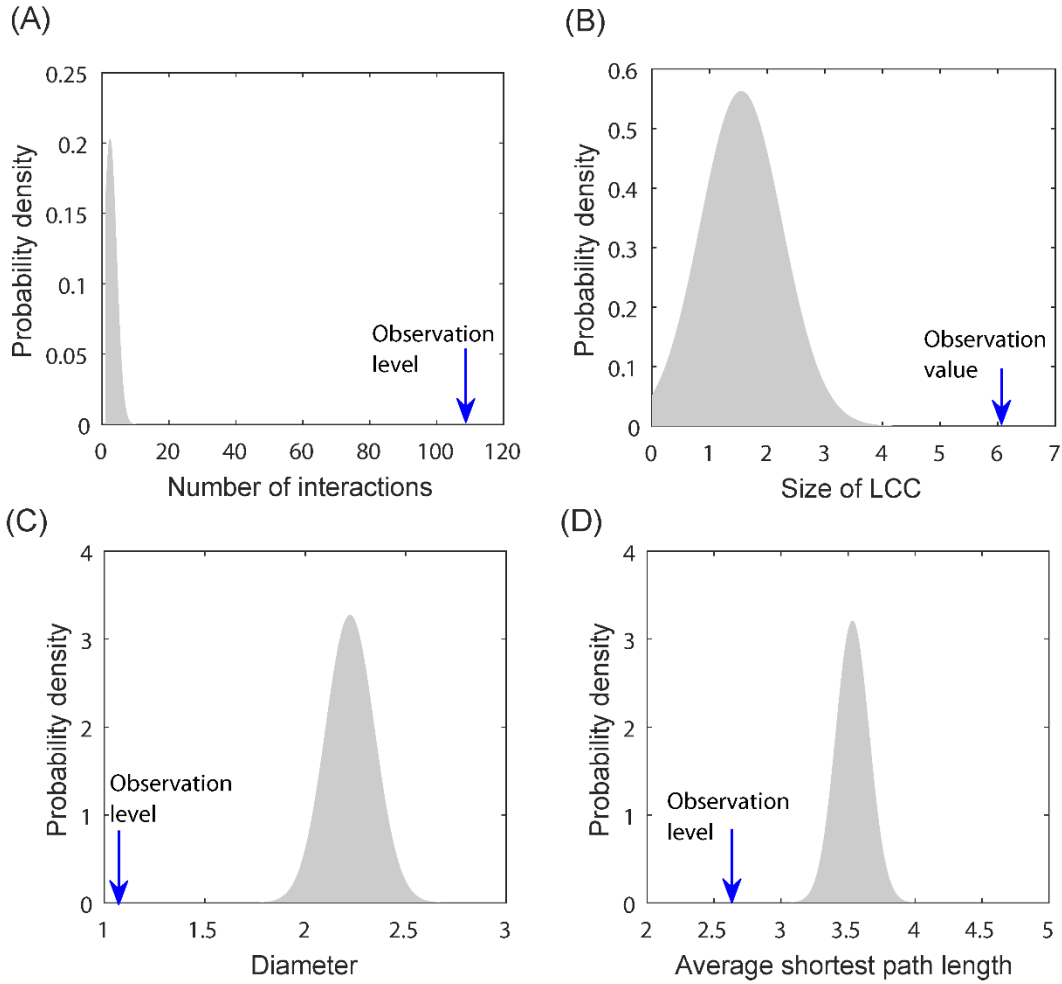

**Figure S1. The topological properties of the placebo module.** (A) The placebo module has significantly more interactions than random expectation ( $p < 1.0 \times 10^{-16}$ ). (B) The placebo module has a significantly larger LCC than random expectation ( $p < 1.0 \times 10^{-16}$ ). (C) The placebo module has a significantly smaller diameter than a random protein set ( $p = 4.5 \times 10^{-21}$ ). (D) The placebo module has a significantly smaller average shortest path length than a random protein set ( $p = 1.8 \times 10^{-13}$ ).

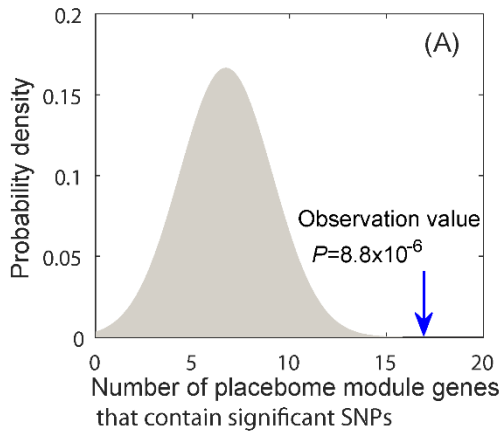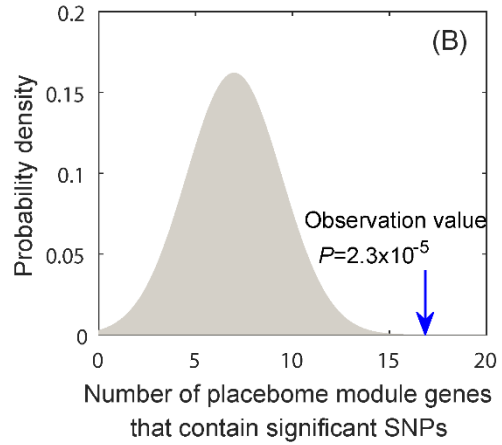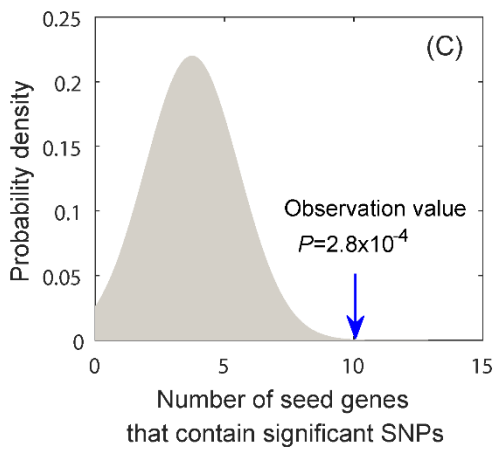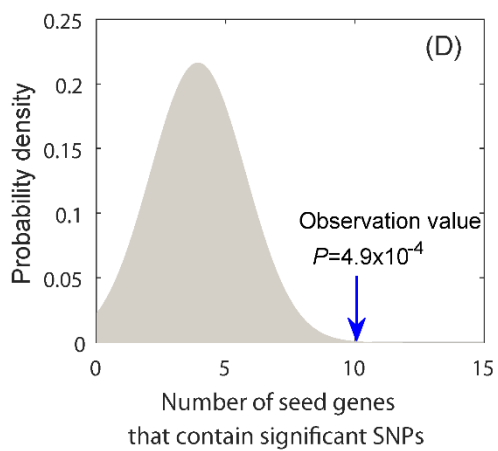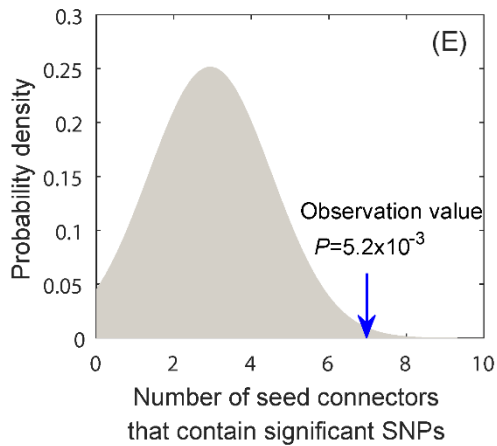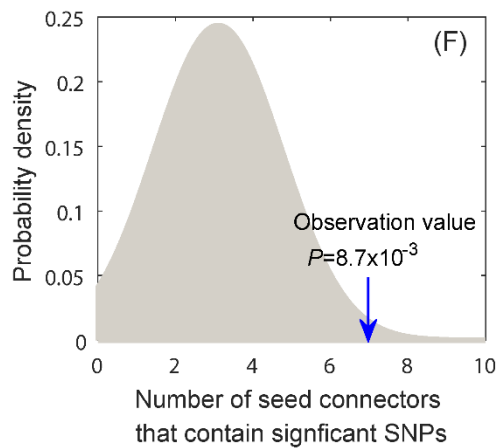

**Figure S2. Significant SNP enrichment of the placebo module.** (A) Compared to a random gene set from the GWAS background, the placebo module is significantly enriched with SNPs that modify the outcome of the placebo arm. (B) Compared to a random gene set from the GWAS background mapped to the human interactome, the placebo module is significantly enriched with SNPs that modify the outcome of the placebo arm. (C) Compared to a random gene set from the GWAS background, the placebo seed genes are significantly enriched with SNPs that modify the outcome of the placebo arm. (D) Compared to a random gene set from the GWAS background mapped to the human interactome, the placebo seed genes are significantly enriched with SNPs that modify the outcome of the placebo arm. (E) Compared to a random gene set from the GWAS background, the placebo seed connectors are significantly enriched with SNPs that modify the outcome of the placebo arm. (D) Compared to a random gene set from the GWAS background mapped to the human interactome, the placebo seed connectors are significantly enriched with SNPs that modify the outcome of the placebo arm.

## **Compiling the comprehensive human interactome**

The mechanisms underlying placebo responses may involve multiple types of molecular interactions. We, therefore, used a comprehensive human interactome, which combines physical macromolecular interactions from different sources, to ascertain the existence of a placebo module. The consolidated human interactome contains protein-protein interactions, protein complexes, protein-DNA interactions, kinase-substrate interactions, metabolic interactions, and signaling pathways. The protein-protein interactions are derived from several high-throughput yeast-two-hybrid studies (*1-4*) and have also been combined with binary interactions from IntAct and MINT databases (*5, 6*), as well as literature-curated interactions obtained from low throughput experiments reported in the IntAct, MINT, HPRD, and BioGRID databases (*5-8*). The manually curated dataset of mammalian protein complexes (CORUM) and experimentally determined human protein complexes are also included in the comprehensive set of protein-protein interactions (*9, 10*). Protein-DNA regulatory interactions are taken from the TRANSFAC database (*11*), and kinase-substrate interactions are obtained from the PhosphositePlus database (*12*). Metabolic enzyme-coupled interactions (two enzymes that share adjacent reactions) are derived from the KEGG and BiGG databases as compiled previously (*13*). In addition, protein interactions from 3D structural prediction and signaling interactions are also included in the construction of the interactome (*14, 15*). This consolidated human interactome has 14,174 proteins (nodes) with 170,303 interactions (edges), after removing duplicate interactions and self-loops. All of the placebo seed gene products in Table 1 can be found in this human interactome.

## **Connecting the placebo seed proteins**

Owing to the incompleteness of placebo seed genes and of the human interactome itself, these seed gene products may not be densely connected to each other to form a network module. We, therefore, developed an algorithm in which we attempt to connect the placebo seed proteins by using as few extra nodes as possible. The principle underlying this algorithm is that seed genes should not be very far from each other and, thus, should reach each other through very short paths. The algorithm, called the Seed-Connector algorithm, is iterative as follows:

**Step 1.** Assume that the seed genes induce a subnetwork. Calculate the size of the largest connected component (LCC) of the subnetwork.

**Step 2.** Consider all the interactors of the seed genes as identified from the human interactome. Add each interactor temporarily to the seed gene list one-by-one. Obtain the subnetwork induced by this temporary seed gene list and determine the size of its LCC.

**Step 3.** Select those interactors that can increase the coverage of seeds in the LCC of the subnetwork maximally, and add them to the seed gene list.

Repeat Step 1, Step 2, and Step 3 until none of the interactors can increase the coverage of seed genes in the LCC of the induced subnetwork. The final subnetwork is the predicted placebo module, which is obtained by including as few additional nodes as possible. The placebo module obtained by this algorithm has a very high ratio of seed genes (gene products) to connector genes (gene products).

### **Disease modules and drug categories**

To gain insights into placebo responses in different diseases, we collected a list of 20 ‘benchmark’ diseases (18 known to have moderate or high placebo responses and 2 known to have little or no placebo response) and 5 symptom phenotypes on which we have prior knowledge about the placebo response based on the literature, and obtained their associated genes from Phenopedia in the HuGE navigator (16). The benchmark diseases with high responses are alcoholism (17), anxiety (18), asthma (19), Crohn disease (20), depression (21), diabetic neuropathies (22), duodenal ulcer (23), epilepsy (24), eating disorders (25), fibromyalgia (22), irritable bowel syndrome (26), Parkinson disease (27), migraine disorders (28), osteoarthritis (29), chronic pancreatitis (30), restless leg syndrome (31), schizophrenia (32), and ulcerative colitis (33). The two with little or no responses are hepatocellular carcinoma and renal cell carcinoma (34). The five symptoms we considered are pain (35), headache (36), nausea (37), fatigue (38), and hot flashes (39). To obtain a reliable list of associated disease genes, we only considered those with at least two publications that support the association if the number of associated genes is over 100.

For prediction purposes, we obtained a comprehensive list of diseases from Phenopedia in the HuGE navigator (16) and assessed the relationships between the placebo module and these diseases at the systems level. There are 2909 Medical Subject Headings (MeSH) disease terms (downloaded in May, 2016), among which we only consider the terms with more than 50 associated genes. We also removed some terms that are not typical diseases or symptoms. A final list of 859 diseases (and symptoms) were considered in our analysis. Again, we only considered those associated genes with at least two publications that support the association if the number of associated genes is over 100. We mapped the disease- or symptom-associated gene products to the human interactome and derived disease modules or symptom modules.

We collected drug categories from DrugBank (40) in which drugs are categorized into different groups based on their therapeutic indications. The targets of these drugs include therapeutic drug targets, drug carriers, drug enzymes, and drug transporters. We collectively refer to this compilation as drug targets. Drug targets are classified based on their drug categories and mapped to the human interactome. To increase the power of prediction, we only considered those drug categories with at least 20 drug targets in the human interactome. A total of 193 drug categories satisfy this criterion. We then assessed the relationships between the placebo module and drug target module from each category at the network level.

## References

1. U. Stelzl *et al.*, A human protein-protein interaction network: a resource for annotating the proteome. *Cell* **122**, 957-968 (2005).
2. J. F. Rual *et al.*, Towards a proteome-scale map of the human protein-protein interaction network. *Nature* **437**, 1173-1178 (2005).
3. K. Venkatesan *et al.*, An empirical framework for binary interactome mapping. *Nat Methods* **6**, 83-90 (2009).
4. T. Rolland *et al.*, A proteome-scale map of the human interactome network. *Cell* **159**, 1212-1226 (2014).
5. S. Kerrien *et al.*, The IntAct molecular interaction database in 2012. *Nucleic Acids Res* **40**, D841-846 (2012).
6. L. Licata *et al.*, MINT, the molecular interaction database: 2012 update. *Nucleic Acids Res* **40**, D857-861 (2012).
7. A. Chatr-Aryamontri *et al.*, The BioGRID interaction database: 2015 update. *Nucleic Acids Res* **43**, D470-478 (2015).
8. T. S. Keshava Prasad *et al.*, Human Protein Reference Database--2009 update. *Nucleic Acids Res* **37**, D767-772 (2009).
9. A. Ruepp *et al.*, CORUM: the comprehensive resource of mammalian protein complexes--2009. *Nucleic Acids Res* **38**, D497-501 (2010).
10. P. C. Havugimana *et al.*, A census of human soluble protein complexes. *Cell* **150**, 1068-1081 (2012).
11. V. Matys *et al.*, TRANSFAC: transcriptional regulation, from patterns to profiles. *Nucleic Acids Res* **31**, 374-378 (2003).
12. P. V. Hornbeck *et al.*, PhosphoSitePlus: a comprehensive resource for investigating the structure and function of experimentally determined post-translational modifications in man and mouse. *Nucleic Acids Res* **40**, D261-270 (2012).
13. D. S. Lee *et al.*, The implications of human metabolic network topology for disease comorbidity. *Proc Natl Acad Sci U S A* **105**, 9880-9885 (2008).
14. Q. C. Zhang *et al.*, Structure-based prediction of protein-protein interactions on a genome-wide scale. *Nature* **490**, 556-560 (2012).

15. A. Vinayagam *et al.*, A directed protein interaction network for investigating intracellular signal transduction. *Sci Signal* **4**, rs8 (2011).
16. W. Yu, M. Clyne, M. J. Khoury, M. Gwinn, Phenopedia and Genopedia: disease-centered and gene-centered views of the evolving knowledge of human genetic associations. *Bioinformatics* **26**, 145-146 (2010).
17. R. Z. Litten *et al.*, The placebo effect in clinical trials for alcohol dependence: an exploratory analysis of 51 naltrexone and acamprosate studies. *Alcohol Clin Exp Res* **37**, 2128-2137 (2013).
18. M. A. Sugarman, A. M. Loree, B. B. Baltes, E. R. Grekin, I. Kirsch, The efficacy of paroxetine and placebo in treating anxiety and depression: a meta-analysis of change on the Hamilton Rating Scales. *PLoS One* **9**, e106337 (2014).
19. D. P. Joyce, C. Jackevicius, K. R. Chapman, R. A. McIvor, S. Kesten, The placebo effect in asthma drug therapy trials: a meta-analysis. *J Asthma* **37**, 303-318 (2000).
20. C. Su, G. R. Lichtenstein, K. Krok, C. M. Brensinger, J. D. Lewis, A meta-analysis of the placebo rates of remission and response in clinical trials of active Crohn's disease. *Gastroenterology* **126**, 1257-1269 (2004).
21. J. C. Fournier *et al.*, Antidepressant drug effects and depression severity: a patient-level meta-analysis. *JAMA* **303**, 47-53 (2010).
22. W. Hauser, E. Bartram-Wunn, C. Bartram, H. Reinecke, T. Tolle, Systematic review: Placebo response in drug trials of fibromyalgia syndrome and painful peripheral diabetic neuropathy-magnitude and patient-related predictors. *Pain* **152**, 1709-1717 (2011).
23. A. J. de Craen *et al.*, Placebo effect in the treatment of duodenal ulcer. *Br J Clin Pharmacol* **48**, 853-860 (1999).
24. A. B. Guekht, A. D. Korczyn, I. B. Bondareva, E. I. Gusev, Placebo responses in randomized trials of antiepileptic drugs. *Epilepsy Behav* **17**, 64-69 (2010).
25. W. P. Carter *et al.*, Pharmacologic treatment of binge eating disorder. *Int J Eat Disord* **34 Suppl**, S74-88 (2003).
26. S. M. Patel *et al.*, The placebo effect in irritable bowel syndrome trials: a meta-analysis. *Neurogastroenterol Motil* **17**, 332-340 (2005).
27. C. G. Goetz *et al.*, Placebo response in Parkinson's disease: comparisons among 11 trials covering medical and surgical interventions. *Mov Disord* **23**, 690-699 (2008).
28. K. Meissner *et al.*, Differential effectiveness of placebo treatments: a systematic review of migraine prophylaxis. *JAMA Intern Med* **173**, 1941-1951 (2013).
29. K. Zou *et al.*, Examination of overall treatment effect and the proportion attributable to contextual effect in osteoarthritis: meta-analysis of randomised controlled trials. *Ann Rheum Dis*, (2016).
30. G. Capurso, L. Cocomello, U. Benedetto, C. Camma, G. Delle Fave, Meta-analysis: the placebo rate of abdominal pain remission in clinical trials of chronic pancreatitis. *Pancreas* **41**, 1125-1131 (2012).
31. S. Fulda, T. C. Wetter, Where dopamine meets opioids: a meta-analysis of the placebo effect in restless legs syndrome treatment studies. *Brain* **131**, 902-917 (2008).
32. B. R. Rutherford *et al.*, Placebo response in antipsychotic clinical trials: a meta-analysis. *JAMA Psychiatry* **71**, 1409-1421 (2014).
33. S. Garud, A. Brown, A. Cheifetz, E. B. Levitan, C. P. Kelly, Meta-analysis of the placebo response in ulcerative colitis. *Dig Dis Sci* **53**, 875-891 (2008).
34. G. Chvetzoff, I. F. Tannock, Placebo effects in oncology. *J Natl Cancer Inst* **95**, 19-29 (2003).
35. H. McQuay, D. Carroll, A. Moore, Variation in the placebo effect in randomised controlled trials of analgesics: all is as blind as it seems. *Pain* **64**, 331-335 (1996).
36. L. Colloca, C. Grillon, Understanding placebo and nocebo responses for pain management. *Curr Pain Headache Rep* **18**, 419 (2014).
37. V. F. Quinn, B. Colagiuri, Placebo interventions for nausea: a systematic review. *Ann Behav Med* **49**, 449-462 (2015).



38. D. T. Ko *et al.*, Beta-blocker therapy and symptoms of depression, fatigue, and sexual dysfunction. *JAMA* **288**, 351-357 (2002).
39. M. de la Cruz, D. Hui, H. A. Parsons, E. Bruera, Placebo and nocebo effects in randomized double-blind clinical trials of agents for the therapy for fatigue in patients with advanced cancer. *Cancer* **116**, 766-774 (2010).
40. V. Law *et al.*, DrugBank 4.0: shedding new light on drug metabolism. *Nucleic Acids Res* **42**, D1091-1097 (2013).
